# Supplementary material for: Interplay between Structure and Charge as a Key to Allosteric Modulation of Human 20S Proteasome by the Basic Fragment of HIV-1 Tat Protein
Source: PubMed Central journal article supplement (PMC4648528; doi:10.1371/journal.pone.0143038), 2015-11-17
Supplement: pone.0143038.s007.pdf [file pone.0143038.s007.pdf]

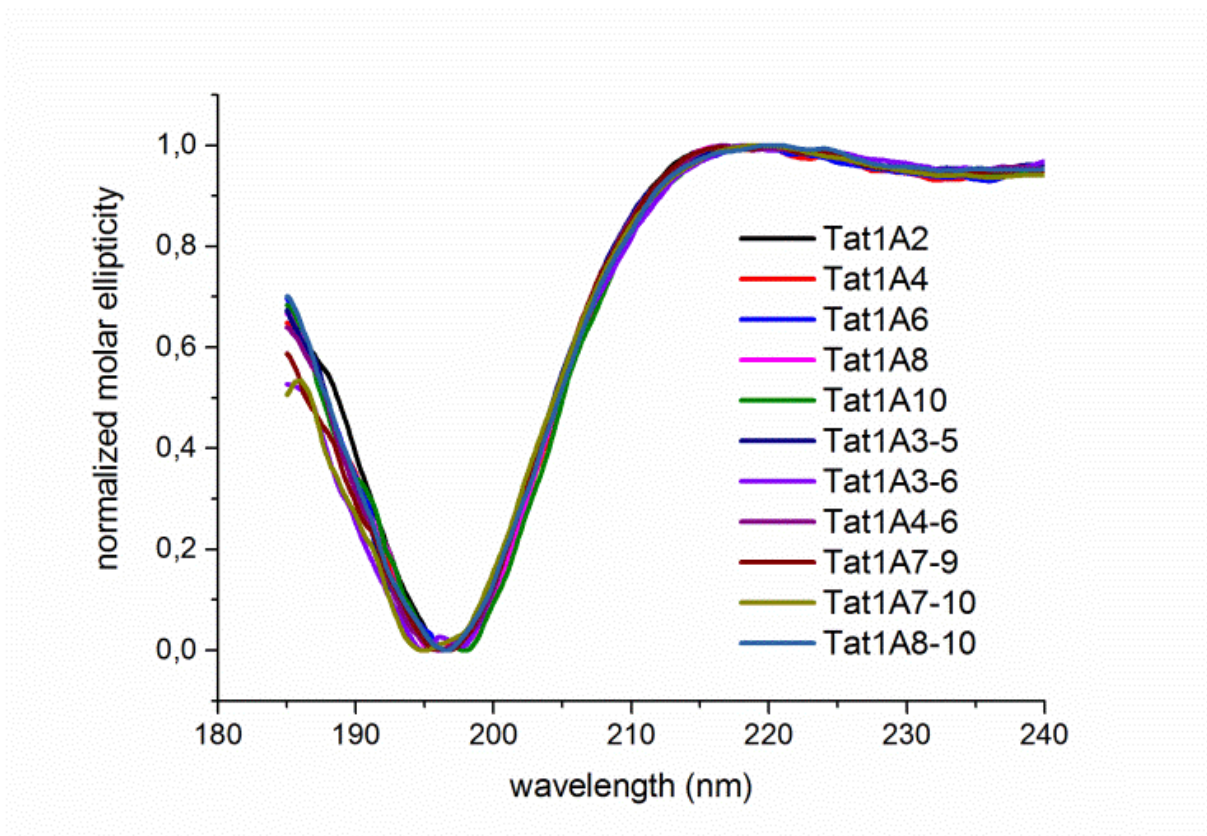

**S5 Fig.** Normalized CD spectra in water for the selected peptides with single and multiple Ala substitutions.
