# Supplementary material for: Interplay between Structure and Charge as a Key to Allosteric Modulation of Human 20S Proteasome by the Basic Fragment of HIV-1 Tat Protein
Source: PubMed Central journal article supplement (PMC4648528; doi:10.1371/journal.pone.0143038), 2015-11-17
Supplement: pone.0143038.s009.pdf [file pone.0143038.s009.pdf]

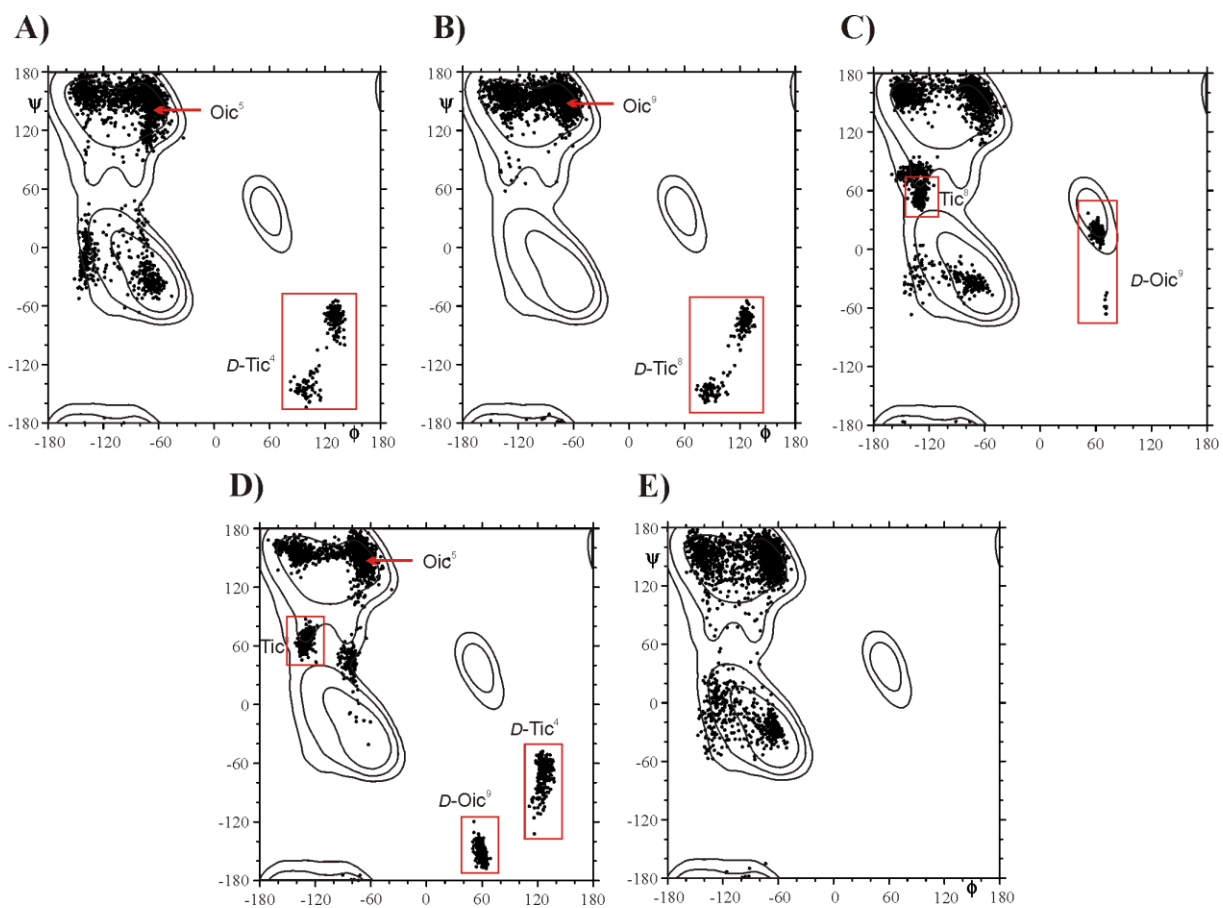

**S7 Fig.** Scatter plots of the dihedral angles ( $\phi$  and  $\psi$  of all residues and all conformations of Tat1\_4-5TO (A), Tat1\_8-9TO (B), Tat1\_8-9TOD (C), Tat1\_4-5TO,8-9TOD (D) and Tat1\_A4-5,8-9 (E) calculated by MD simulations with time-averaged restraints.
