# Supplementary material for: Interplay between Structure and Charge as a Key to Allosteric Modulation of Human 20S Proteasome by the Basic Fragment of HIV-1 Tat Protein
Source: PubMed Central journal article supplement (PMC4648528; doi:10.1371/journal.pone.0143038), 2015-11-17
Supplement: pone.0143038.s011.pdf [file pone.0143038.s011.pdf]

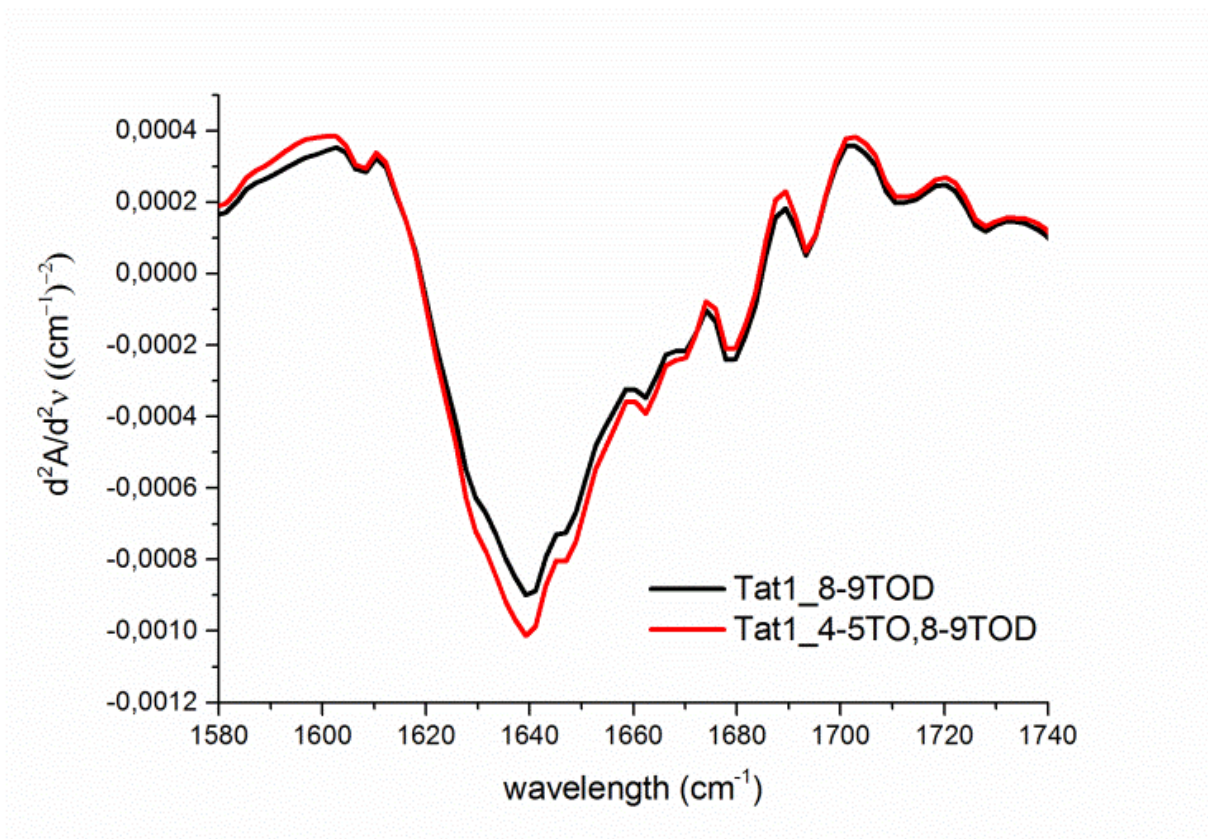

**S9 Fig.** Second derivative of Tat1\_8-9TOD and Tat1\_4-5TO,8-9TOD FTIR spectra recorded in water.
