# Supplementary material for: Interplay between Structure and Charge as a Key to Allosteric Modulation of Human 20S Proteasome by the Basic Fragment of HIV-1 Tat Protein
Source: PubMed Central journal article supplement (PMC4648528; doi:10.1371/journal.pone.0143038), 2015-11-17
Supplement: pone.0143038.s014.pdf [file pone.0143038.s014.pdf]

**S2 Table.** Dissociation constants  $K_d$  calculated on the basis of the thermophoresis curves.

| <b>Compound</b>   | <b><math>K_d</math> [<math>\mu\text{M}</math>]</b> |
|-------------------|----------------------------------------------------|
| Tat1              | 4.82 ( $\pm 0.39$ )                                |
| Tat1_A4-6         | 12.07 ( $\pm 1.27$ )                               |
| Tat1_A8-10        | 13.47 ( $\pm 0.58$ )                               |
| Tat1_A4-5,8-9     | 22.27 ( $\pm 1.41$ )                               |
| Tat1_4-5TO        | 8.91 ( $\pm 0.31$ )                                |
| Tat1_8-9TO        | 10.39 ( $\pm 1.36$ )                               |
| Tat1_8-9TOD       | 8.14 ( $\pm 0.53$ )                                |
| Tat1_4-5TO,8-9TOD | 8.38 ( $\pm 1.16$ )                                |
