# Supplementary material for: Interplay between Structure and Charge as a Key to Allosteric Modulation of Human 20S Proteasome by the Basic Fragment of HIV-1 Tat Protein
Source: PubMed Central journal article supplement (PMC4648528; doi:10.1371/journal.pone.0143038), 2015-11-17
Supplement: pone.0143038.s015.pdf [file pone.0143038.s015.pdf]

**S3 Table.** Proton chemical shifts and the vicinal coupling constants of Tat1\_A4-5,8-9 in H<sub>2</sub>O/D<sub>2</sub>O (9:1) at 298 K.

| Residue           | Proton chemical shifts [ppm] |            |           |            |            |                                                  | <sup>3</sup> J <sub>HNH<math>\alpha</math></sub> |
|-------------------|------------------------------|------------|-----------|------------|------------|--------------------------------------------------|--------------------------------------------------|
|                   | HN                           | H $\alpha$ | H $\beta$ | H $\gamma$ | H $\delta$ | others                                           |                                                  |
| Gly <sup>1</sup>  |                              | 3.83       |           |            |            |                                                  |                                                  |
| Arg <sup>2</sup>  | 8.70                         | 4.32       | 1.73;1.80 | 1.62       | 3.19       | $\epsilon$ -NH 7.21                              | 7.2                                              |
| Lys <sup>3</sup>  | 8.64                         | 4.27       | 1.73;1.79 | 1.44       | 1.62       | H $\epsilon$ 2.98; $\zeta$ -NH <sub>2</sub> 7.53 | 7.5                                              |
| Ala <sup>4</sup>  | 8.51                         | 4.27       | 1.36      |            |            |                                                  |                                                  |
| Ala <sup>5</sup>  | 8.45                         | 4.26       | 1.36      |            |            |                                                  |                                                  |
| Arg <sup>6</sup>  | 8.45                         | 4.26       | 1.74;1.80 | 1.61       | 3.18       | $\epsilon$ -NH 7.21                              |                                                  |
| Gln <sup>7</sup>  | 8.57                         | 4.29       | 1.96;2.06 | 2.36       |            | $\epsilon$ -NH <sub>2</sub> 6.95;7.64            | 7.7                                              |
| Ala <sup>8</sup>  | 8.53                         | 4.29       | 1.37      |            |            |                                                  |                                                  |
| Ala <sup>9</sup>  | 8.44                         | 4.26       | 1.36      |            |            |                                                  |                                                  |
| Arg <sup>10</sup> | 8.47                         | 4.60       | 1.71;1.84 | 1.68       | 3.21       | $\epsilon$ -NH 7.22                              | 7.9                                              |
| Pro <sup>11</sup> | -                            | 4.47       | 1.96;2.32 | 2.00       | 3.63;3.82  |                                                  | -                                                |
| Ser <sup>12</sup> | 8.60                         | 4.47       | 3.88;3.98 |            |            |                                                  | 8.1                                              |
|                   | 8.67                         | 4.45       | 3.92;3.99 |            |            |                                                  | 8.8                                              |
|                   | 8.49                         | 4.50       | 3.86;3.93 |            |            |                                                  |                                                  |
