# Supplementary material for: Interplay between Structure and Charge as a Key to Allosteric Modulation of Human 20S Proteasome by the Basic Fragment of HIV-1 Tat Protein
Source: PubMed Central journal article supplement (PMC4648528; doi:10.1371/journal.pone.0143038), 2015-11-17
Supplement: pone.0143038.s016.pdf [file pone.0143038.s016.pdf]

**S4 Table.** Proton chemical shifts and the vicinal coupling constants of Tat1\_4-5TO in phosphate buffer pH 7.4 at 301 K.

| Residue                    | Proton chemical shifts [ppm] |            |            |            |            |                                                                                                          | $^3J_{\text{HNH}\alpha}$ |
|----------------------------|------------------------------|------------|------------|------------|------------|----------------------------------------------------------------------------------------------------------|--------------------------|
|                            | HN                           | H $\alpha$ | H $\beta$  | H $\gamma$ | H $\delta$ | others                                                                                                   |                          |
| Gly <sup>1</sup>           |                              | 3.96       |            |            |            |                                                                                                          |                          |
| Arg <sup>2</sup>           | 8.70                         | 4.45       | 1.80       | 1.67       | 3.20       | $\epsilon$ -NH 7.12                                                                                      |                          |
| Lys <sup>3</sup>           | 8.50                         | 5.18       | 1.73       | 1.43       | 1.69       | H $\epsilon$ 2.94                                                                                        | 9.2                      |
|                            | 8.66                         | 5.06       | 1.76       | 1.49       |            | H $\epsilon$ 3.03                                                                                        | 8.9                      |
| <i>D</i> -Tic <sup>4</sup> | -                            | 5.27       | 3.11,3.31  |            |            | H <sub>5</sub> 7.33; H <sub>6</sub> 7.25; H <sub>7</sub> 7.24; H <sub>8</sub> 7.20;                      | -                        |
|                            |                              | 5.60       | 3.25,3.40  |            |            |                                                                                                          |                          |
|                            |                              | 5.16       | 3.11, 3.26 |            |            |                                                                                                          |                          |
| Oic <sup>5</sup>           | -                            | 4.41       | 2.04,2.27  | 2.55       | 4.13       | H <sub>4</sub> 1.84, 1.36; H <sub>5</sub> 1.33,1.54; H <sub>6</sub> 1.22,1.75; H <sub>7</sub> 1.51, 2.14 | -                        |
|                            |                              |            |            | 2.58       | 4.21       |                                                                                                          |                          |
|                            |                              |            |            |            | 4.12       |                                                                                                          |                          |
| Arg <sup>6</sup>           | 8.05                         | 4.27       | 1.79,1.8   | 1.66       | 3.20       | $\epsilon$ -NH 7.20                                                                                      | 8.9                      |
| Gln <sup>7</sup>           | 8.24                         | 4.33       | 1.96,2.04  | 2.34       |            | $\epsilon$ -NH <sub>2</sub> 6.90, 7.55                                                                   | 8.8                      |
|                            | 8.55                         | 4.45       | 2.06,2.13  | 2.43       |            | * $\epsilon$ -NH <sub>2</sub> 6.93,7.59                                                                  | 8.3                      |
|                            | 8.29                         | 4.37       | 2.03       | 2.39       |            |                                                                                                          | 7.6                      |
| Arg <sup>8</sup>           | 8.37                         | 4.37       | 1.66,1.78  | 1.88       | 3.24       | $\epsilon$ -NH 7.23                                                                                      | 8.2                      |
| Arg <sup>9</sup>           | 8.42                         | 4.37       | 1.82       | 1.66       | 3.23       | $\epsilon$ -NH 7.23                                                                                      | 8.4                      |
| Arg <sup>10</sup>          | 8.47                         | 4.67       | 1.81,1.91  | 1.66       | 3.23       | $\epsilon$ -NH 7.23                                                                                      |                          |
| Pro <sup>11</sup>          | -                            | 4.51       | 2.36,2.05  | 2.11       | 3.72,3.88  |                                                                                                          | -                        |
|                            |                              | 4.69       | 2.00,2.44  | 2.26       | 3.56,3.67  |                                                                                                          |                          |
| Ser <sup>12</sup>          | 7.98                         | 4.35       | 3.89       |            |            |                                                                                                          | 8.8                      |
|                            | 7.98                         | 4.29       | 3.90       |            |            |                                                                                                          | 8.1                      |
|                            | 8.10                         | 4.24       | 3.93       |            |            |                                                                                                          | 7.8                      |

\*Due to no ROE interactions, it is impossible to correlate these protons with the particular minor conformation of Gln.
