# Supplementary material for: Interplay between Structure and Charge as a Key to Allosteric Modulation of Human 20S Proteasome by the Basic Fragment of HIV-1 Tat Protein
Source: PubMed Central journal article supplement (PMC4648528; doi:10.1371/journal.pone.0143038), 2015-11-17
Supplement: pone.0143038.s018.pdf [file pone.0143038.s018.pdf]

**S6 Table.** Proton chemical shifts and the vicinal coupling constants of Tat1\_8-9TOD in phosphate buffer with the reduced pH (pH 4.5) at 301 K.

| Residue            | Proton chemical shifts [ppm] |            |           |            |            |                                                                                                         | $^3J_{\text{HNH}\alpha}$ |
|--------------------|------------------------------|------------|-----------|------------|------------|---------------------------------------------------------------------------------------------------------|--------------------------|
|                    | HN                           | H $\alpha$ | H $\beta$ | H $\gamma$ | H $\delta$ | others                                                                                                  |                          |
| Gly <sup>1</sup>   |                              | 3.91       |           |            |            |                                                                                                         |                          |
| Arg <sup>2</sup>   | 8.64                         | 4.39       | 1.79,1.85 | 1.68       | 3.24       | $\epsilon$ -NH 7.21                                                                                     | 6.9                      |
| Lys <sup>3</sup>   | 8.51                         | 4.33       | 1.79      | 1.47       | 1.71       | H $\epsilon$ 3.03; $\zeta$ -NH <sub>2</sub> 7.55                                                        | 6.9                      |
| Lys <sup>4</sup>   | 8.44                         | 4.33       | 1.78,1.82 | 1.45       | 1.65       | H $\epsilon$ 3.03                                                                                       |                          |
| Arg <sup>5</sup>   | 8.44                         | 4.25       |           |            | 3.23       | $\epsilon$ -NH 7.09                                                                                     |                          |
| Arg <sup>6</sup>   | 8.44                         | 4.25       |           |            | 3.23       | $\epsilon$ -NH 7.09                                                                                     |                          |
| Gln <sup>7</sup>   | 8.66                         | 5.03       | 1.97,2.13 | 2.41       |            | $\epsilon$ -NH <sub>2</sub> 6.95, 7.57                                                                  | 8.4                      |
|                    | 8.57                         | 5.04       | 1.98,2.08 | 2.33       |            |                                                                                                         | 8.4                      |
|                    | 8.68                         | 5.02       | 1.96,2.12 | 2.42       |            |                                                                                                         | 8.1                      |
| Tic <sup>8</sup>   | -                            | 5.12       | 3.09,3.16 |            | 4.67,4.94  | H <sub>5</sub> 7.30; H <sub>6</sub> 7.33; H <sub>7</sub> 7.33; H <sub>8</sub> 7.27;                     | -                        |
|                    |                              | 5.07       | 3.17,3.10 |            |            |                                                                                                         |                          |
|                    |                              | 4.25       | 2.96      |            | 4.62,5.00  | H <sub>5</sub> 7.21                                                                                     |                          |
| D-Oic <sup>9</sup> | -                            | 4.41       | 2.52      | 2.52       | 4.16       | H <sub>4</sub> 1.49,1.77; H <sub>5</sub> 1.33, 1.48; H <sub>6</sub> 1.19,1.75; H <sub>7</sub> 1.41,1.99 | -                        |
|                    |                              |            |           |            | 4.17       |                                                                                                         |                          |
|                    |                              | 5.01       | 2.73      | 2.43       | 4.08       |                                                                                                         |                          |
| Arg <sup>10</sup>  | 7.78                         | 4.71       | 1.85      | 1.61       | 3.16       | $\epsilon$ -NH 7.15                                                                                     | 8.5                      |
|                    | 7.73                         | 4.73       | 1.85      | 1.63       | 3.16       |                                                                                                         |                          |
|                    | 7.71                         | 4.72       | 1.85      | 1.64       | 3.19       |                                                                                                         |                          |
| Pro <sup>11</sup>  | -                            | 4.40       | 2.26      | 1.90,1.99  | 3.62,3.69  |                                                                                                         | -                        |
|                    |                              | 4.43       | 2.40      | 2.08       | 3.74,3.95  |                                                                                                         |                          |
|                    |                              | 4.46       | 2.26      |            | 3.63,3.70  |                                                                                                         |                          |
| Ser <sup>12</sup>  | 8.00                         | 4.26       | 3.86      |            |            |                                                                                                         | 7.1                      |
|                    | 7.85                         | 4.21       | 3.84      |            |            |                                                                                                         | 7.7                      |
|                    | 7.97                         | 4.30       | 3.85      |            |            |                                                                                                         | 8.3                      |
|                    | 8.09                         | 4.19       | 3.89      |            |            |                                                                                                         |                          |
