# Supplementary material for: Interplay between Structure and Charge as a Key to Allosteric Modulation of Human 20S Proteasome by the Basic Fragment of HIV-1 Tat Protein
Source: PubMed Central journal article supplement (PMC4648528; doi:10.1371/journal.pone.0143038), 2015-11-17
Supplement: pone.0143038.s019.pdf [file pone.0143038.s019.pdf]

**S7 Table.** Proton chemical shifts and the vicinal coupling constants of Tat1\_4-5TO,8-9TOD in phosphate buffer with the reduced pH (pH 4.5) at 301 K.

| Residue            | Proton chemical shifts [ppm]** |            |           |            |            |                                            | $^3J_{\text{HNH}\alpha}$ |
|--------------------|--------------------------------|------------|-----------|------------|------------|--------------------------------------------|--------------------------|
|                    | HN                             | H $\alpha$ | H $\beta$ | H $\gamma$ | H $\delta$ | others                                     |                          |
| Gly <sup>1</sup>   |                                | 3.89       |           |            |            |                                            |                          |
| Arg <sup>2</sup>   | 8.68                           | 4.41       | 1.77      | 1.59       | 3.05       | $\epsilon$ -NH 6.97                        | 9.3                      |
| Lys <sup>3</sup>   | 8.52                           | 5.17       | 1.71      | 1.43       | 1.66       | H $\epsilon$ 2.93                          | 8.5                      |
|                    | 8.47                           | 5.23       | 1.79      | 1.46       | 1.71       | H $\epsilon$ 2.95                          |                          |
| D-Tic <sup>4</sup> | -                              | 5.23       | 3.10,3.29 |            | 4.68,4.93  | H $\delta$ 7.31                            | -                        |
| Oic <sup>5</sup>   | -                              | 4.35       | 1.97,2.26 | 2.53       | 4.11       | H $\delta$ 1.22,1.74; H $\gamma$ 1.46,2.11 | -                        |
| Arg <sup>6</sup>   | 7.98                           | 4.18       | 1.58,1.68 | 1.46       | 3.07       | $\epsilon$ -NH 7.10                        |                          |
| Gln <sup>7</sup>   | 8.42                           | 5.00       | 1.97,2.10 | 2.34       |            | $\epsilon$ -NH <sub>2</sub> 6.91,7.53      |                          |
|                    | 8.32                           | 4.96       | 2.00,2.23 | 2.44       |            | * $\epsilon$ -NH <sub>2</sub> 6.84,7.46    |                          |
|                    | 8.38                           | 4.99       | 2.02      | 2.23       |            | * $\epsilon$ -NH <sub>2</sub> 6.94,7.60    |                          |
|                    | 8.64                           | 5.10       | 2.03      | 2.41       |            | * $\epsilon$ -NH <sub>2</sub> 6.97,7.57    |                          |
| Tic <sup>8</sup>   | -                              | 5.15       | 3.14,3.33 |            | 4.62,4.80  | H $\delta$ 7.22                            | -                        |
|                    |                                | 4.24       | 2.96      |            |            | H $\delta$ 7.21                            |                          |
| D-Oic <sup>9</sup> | -                              | 4.42       | 2.24,2.52 | 2.55       | 4.16       | H $\delta$ 1.22,1.76; H $\gamma$ 1.46,2.04 | -                        |
|                    |                                | 5.00       | 2.74      |            | 4.07       |                                            |                          |
| Arg <sup>10</sup>  | 7.82                           | 4.69       | 1.67,1.85 | 1.61       | 3.18       | $\epsilon$ -NH 7.18                        | 8.4                      |
|                    | 8.70                           | 4.74       | 1.77,1.97 | 1.62       | 3.28       | $\epsilon$ -NH 7.29                        | 7.1                      |
|                    | 7.79                           | 4.69       | 1.68,1.86 | 1.62       | 3.17       | $\epsilon$ -NH 7.18                        | 8.4                      |
| Pro <sup>11</sup>  | -                              | 4.40       | 2.26      | 1.89,2.00  | 3.64,3.70  |                                            | -                        |
|                    |                                | 4.56       | 2.44      | 2.10       | 3.95       |                                            |                          |
| Ser <sup>12</sup>  | 7.97                           | 4.27       | 3.87      |            |            |                                            | 6.5                      |
|                    | 7.86                           | 4.24       | 3.86      |            |            |                                            |                          |
|                    | 8.03                           | 4.27       | 3.89      |            |            |                                            |                          |

\*Due to no ROE interactions, it is impossible to correlate these protons with the particular minor conformation of Gln.

\*\*In addition to the data presented in the table, there were signals difficult to unambiguous assignment. Indeed, it is possible to recognize a spin system and consequently amino acid residue (Arg and Tic), however due to no interresidue ROE cross peaks, we cannot confirm the position of residue in the sequence.
