# Supplementary material for: Interplay between Structure and Charge as a Key to Allosteric Modulation of Human 20S Proteasome by the Basic Fragment of HIV-1 Tat Protein
Source: PLOS journal article supplement (doi:10.1371/journal.pone.0143038), 2015-11-17
Supplement: S5 (10.1371/journal.pone.0143038.s005) [file journal.pone.0143038.s005]

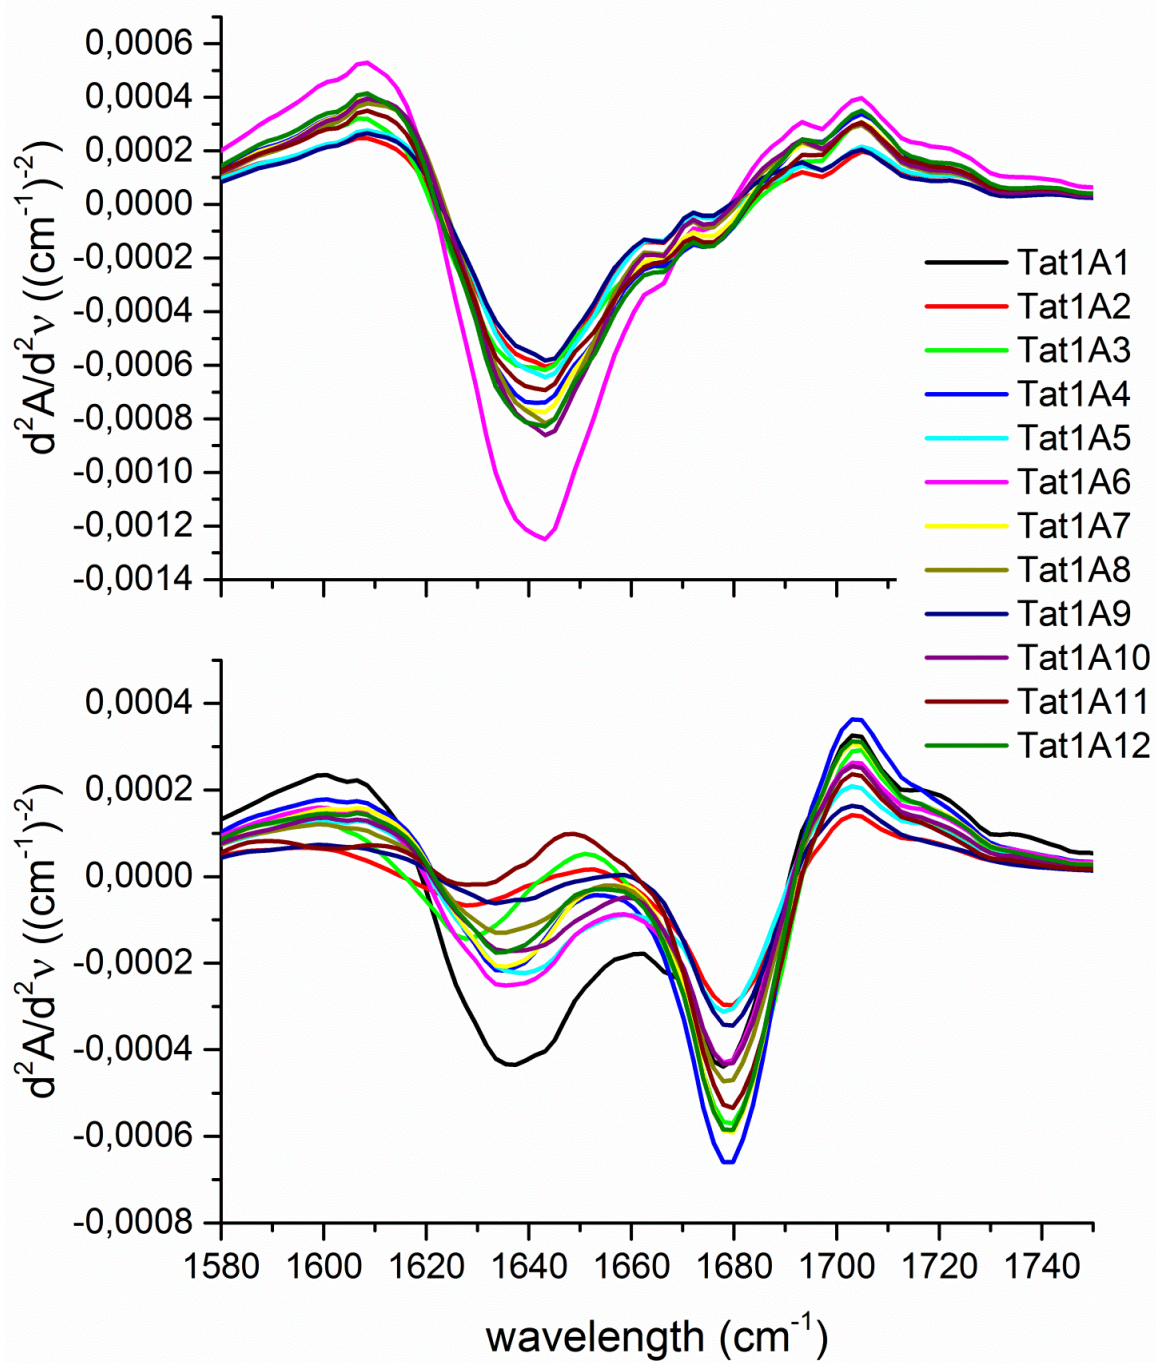

**S3 Fig.** Second derivative of the FTIR spectra of the single Ala-scan peptides in H<sub>2</sub>O (A) and in a hydrated film mode (B).
